# Supplementary material
Source: PubMed Central journal article supplement (PMC9793242)
Supplement: NIHMS1857139-supplement-1.pdf [file NIHMS1857139-supplement-1.pdf]

**Supplemental Material**

**Table 2b. Sensitivity Analysis excluding participants with Cognitive Impairment: Multilevel Linear Regression Models for Cognitive Function, Walkable Neighborhoods, Walking Behavior, and Physical Activity: REgards, 2013-2016**

|                              | Unconditional<br>Model | + Individual<br>factors | + Objective NB<br>features | + Subjective NB<br>features | + Physical<br>Activity | + Physical<br>Health Status |
|------------------------------|------------------------|-------------------------|----------------------------|-----------------------------|------------------------|-----------------------------|
|                              | Model A                | Model B                 | Model C                    | Model D                     | Model E                | Model F                     |
| Measure                      | β-Coefficient          |                         |                            |                             |                        |                             |
| Fixed effects                |                        |                         |                            |                             |                        |                             |
| Intercept                    | 0.39***                | 3.15 ***                | 2.61***                    | 2.61***                     | 2.07***                | 1.22***                     |
| Individual factors (Level 1) |                        |                         |                            |                             |                        |                             |
| Age (centered at 55)         |                        | -0.11***                | -0.11***                   | -0.11***                    | -0.10***               | -0.10***                    |
| Female (ref=Male)            |                        | 0.37***                 | 0.40***                    | 0.41***                     | 0.41***                | 0.44***                     |
| Black (ref=White)            |                        | -1.08***                | -0.96***                   | -0.96***                    | -0.97***               | -0.98***                    |
| Education: (ref=College+)    |                        |                         |                            |                             |                        |                             |
| <HS                          |                        | -2.13***                | -1.99***                   | -1.93***                    | -1.86***               | -1.78***                    |
| HS                           |                        | -1.48***                | -1.35***                   | -1.31***                    | -1.27***               | -1.21***                    |
| Some college                 |                        | -0.89***                | -0.80***                   | -0.77***                    | -0.71***               | -0.68***                    |
| Any Walking (ref=none)       |                        |                         |                            |                             | 0.10                   | 0.07                        |

|                                                        |          |          |          |         |
|--------------------------------------------------------|----------|----------|----------|---------|
| Walking (mins/day)                                     |          |          | -0.0003  | -0.0005 |
| Any Moderate PA (ref=none)                             |          |          | 0.51***  | 0.49*** |
| Moderate PA (mins/day)                                 |          |          | -0.0004  | -0.0004 |
| Any Vigorous PA (ref=none)                             |          |          | 0.17*    | 0.11    |
| Vigorous PA (mins/day)                                 |          |          | -0.002*  | -0.002* |
| Physical Health Status (SF-12)                         |          |          |          | 0.02*** |
| Objectively Measured Neighborhood Features (Level 2)   |          |          |          |         |
| Socioeconomic Disadvantage (%)                         | -0.01*** | -0.01*** | -0.01*** | -0.01** |
| Urban (ref=Rural)                                      | 0.17*    | 0.13     | 0.12     | 0.11    |
| Count of open parks (natural log)                      | 0.08*    | 0.06     | 0.05     | 0.05    |
| Street connectivity (in 0.1 units)                     | 0.13*    | 0.15*    | 0.16**   | 0.15*   |
| Subjectively Perceived Neighborhood Features (Level 1) |          |          |          |         |
| Heavy Traffic: (ref=Not Really a<br>Problem)           |          |          |          |         |
| <i>Very Serious Problem</i>                            |          | -0.57*** | -0.54*** | -0.48** |
| <i>Somewhat Serious<br/>    Problem</i>                |          | -0.29**  | -0.29**  | -0.22*  |
| <i>Minor Problem</i>                                   |          | -0.12*   | -0.13*   | -0.12*  |

Lack of Parks: (ref=Not Really a  
Problem)

|                                     |  |  |  |         |         |         |
|-------------------------------------|--|--|--|---------|---------|---------|
| <i>Very Serious Problem</i>         |  |  |  | -0.37** | -0.37** | -0.29*  |
| <i>Somewhat Serious<br/>Problem</i> |  |  |  | -0.36** | -0.37** | -0.32** |
| <i>Minor Problem</i>                |  |  |  | -0.13*  | -0.15*  | -0.12   |

---

Variance Components

---

|                         |       |       |          |           |          |          |
|-------------------------|-------|-------|----------|-----------|----------|----------|
| Intercept (tract-level) | 0.444 | 0.042 | 5.65e-09 | 9.96e-12  | 1.26e-08 | 3.11e-14 |
| ICC                     | 0.078 | 0.010 | 1.40e-09 | 2.49e-012 | 3.20e-09 | 8.10e-15 |

---

p<0.05 = \*, p<0.01=\*\*, p<0.001\*\*\*

Note: ICC=Intraclass Correlation Coefficient; HS=High School; NB=Neighborhood; Table values are  $\beta$ -Coefficients
